# Supplementary material
Source: Springer Nature journal article supplement (https://www.springermedizin.de/resource/supplementary/12889_2013_5711_MOESM4_ESM.pdf/9496032)

**Asthma****Rhinitis**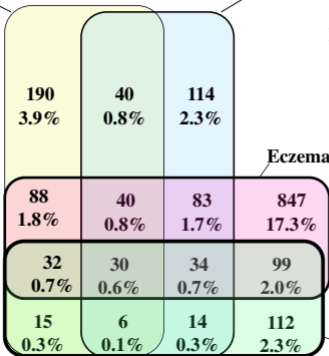**No criteria fulfilled****3,142****64.3%****Eczema****Food allergy**

Supplement: MOESM4 [file 9496032]
